# Supplementary material for: Scripted tours through a giant inflatable colon: An innovative and effective educational tool in urban communities
Source: PubMed Central journal article supplement — Prev Med Rep. 2020 Nov 17;20:101248. doi: 10.1016/j.pmedr.2020.101248 (PMC7695982; doi:10.1016/j.pmedr.2020.101248), 2020-11-17
Supplement: mmc3.pdf [file mmc3.pdf]

Location of Event \_\_\_\_\_

Date of Event \_\_\_\_\_

Please list your initials \_\_\_\_\_ and your date of birth (month, day & year): \_\_\_\_ / \_\_\_\_ / \_\_\_\_

Are you Hispanic or Latino? <sup>1</sup> Yes <sup>2</sup> No

What term best describes your race?

- <sup>1</sup> White/Caucasian     
 <sup>2</sup> Black/African American     
 <sup>3</sup> Asian     
 <sup>4</sup> American Indian/Alaskan Native  
<sup>5</sup> Native Hawaiian/Pacific Islander     
 <sup>6</sup> Mixed race     
 <sup>7</sup> Other \_\_\_\_\_

**By answering this exit survey, you are agreeing to participate in a study that will help us understand how well this Inflatable Colon exhibit is at teaching people about colon cancer. Completing this survey is optional and NOT required. You can also skip any questions you are not comfortable answering.**

**PLEASE ANSWER THE FOLLOWING QUESTIONS AFTER WALKING THROUGH THE INFLATABLE COLON**

### QUESTIONS

|    |                                                                                                                 | YES                                   | NO                                    |
|----|-----------------------------------------------------------------------------------------------------------------|---------------------------------------|---------------------------------------|
| 1. | Do you know what a colon polyp is?                                                                              | <input type="checkbox"/> <sup>1</sup> | <input type="checkbox"/> <sup>2</sup> |
| 2. | Do you know what colon cancer is?                                                                               | <input type="checkbox"/> <sup>1</sup> | <input type="checkbox"/> <sup>2</sup> |
| 3. | Do you know what a cancer screening test is?                                                                    | <input type="checkbox"/> <sup>1</sup> | <input type="checkbox"/> <sup>2</sup> |
| 4. | Do you know what the different types of screening tests available for colon cancer are?                         | <input type="checkbox"/> <sup>1</sup> | <input type="checkbox"/> <sup>2</sup> |
| 5. | Do you think most patients survive colon cancer if it is found early and removed?                               | <input type="checkbox"/> <sup>1</sup> | <input type="checkbox"/> <sup>2</sup> |
| 6. | Would you encourage others to visit and walk through the inflatable colon as a way to learn about colon cancer? | <input type="checkbox"/> <sup>1</sup> | <input type="checkbox"/> <sup>2</sup> |

7. How much do you feel you know about colon cancer AFTER touring the inflatable colon?  
<sup>1</sup> Unknowledgeable     
 <sup>2</sup> Somewhat Knowledgeable     
 <sup>3</sup> Very Knowledgeable

8. How much do you feel you know about how colon cancer progresses AFTER touring the inflatable colon?  
<sup>1</sup> Unknowledgeable     
 <sup>2</sup> Somewhat Knowledgeable     
 <sup>3</sup> Very Knowledgeable

9. How effective is the inflatable colon as an educational tool to teach people about colon cancer?  
<sup>1</sup> Ineffective     
 <sup>2</sup> Somewhat Effective     
 <sup>3</sup> Very Effective

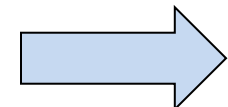

|     |                                                                                                                                                     | NOT<br>LIKELY                         | SOMEWHAT<br>LIKELY                    | VERY<br>LIKELY                        |
|-----|-----------------------------------------------------------------------------------------------------------------------------------------------------|---------------------------------------|---------------------------------------|---------------------------------------|
| 10. | After walking through the inflatable colon, how likely are you to talk to your doctor about colon cancer screening?                                 | <input type="checkbox"/> <sub>1</sub> | <input type="checkbox"/> <sub>2</sub> | <input type="checkbox"/> <sub>3</sub> |
| 11. | After walking through the inflatable colon, how likely are you to get screened for colon cancer based on American Cancer Society's recommendations? | <input type="checkbox"/> <sub>1</sub> | <input type="checkbox"/> <sub>2</sub> | <input type="checkbox"/> <sub>3</sub> |
| 12. | After walking through the inflatable colon, how likely are you to talk about colon cancer with:                                                     |                                       |                                       |                                       |
|     | a) Your relatives (parents, siblings, aunts, uncles, cousins, etc.)                                                                                 | <input type="checkbox"/> <sub>1</sub> | <input type="checkbox"/> <sub>2</sub> | <input type="checkbox"/> <sub>3</sub> |
|     | b) Your peers (friends, colleagues, etc.)                                                                                                           | <input type="checkbox"/> <sub>1</sub> | <input type="checkbox"/> <sub>2</sub> | <input type="checkbox"/> <sub>3</sub> |
|     | c) Your community members                                                                                                                           | <input type="checkbox"/> <sub>1</sub> | <input type="checkbox"/> <sub>2</sub> | <input type="checkbox"/> <sub>3</sub> |
|     | d) Individuals at risk (those 50+, those with a family history, etc.)                                                                               | <input type="checkbox"/> <sub>1</sub> | <input type="checkbox"/> <sub>2</sub> | <input type="checkbox"/> <sub>3</sub> |

Thanks for completing this survey!
